# Supplementary material for: Immunological quantitative detection of dicofol in medicinal materials
Source: Royal Society of Chemistry journal article supplement (doi:10.1039/d2an00462c), 2022-01-01
Supplement: d2an00462c1.pdf [file d2an00462c1.pdf]

## *Supporting Information*

# **Immunological quantitative detection of dicofol in medicinal materials**

### **Contents**

**Fig. S1** The GC-MS spectrums of dicofol negative liquorice and angelica sinensis samples.

**Fig. S2** The LC-MS characterization of DICH: (a) EIC of DICH; (b) MS spectrum of DICH.

**Fig. S3** The UV absorption spectra of conjugates: (a) immunogen (DICH-KLH); (b) coating antigen (DDA-BSA).

**Fig. S4** Optimization of the resuspension buffer: results from four kinds of reagents (Reagent 1, 0.01 mol/L PBS containing 1% Tween-20; Reagent 2, 0.01 mol/L PBS containing 1% PEG; Reagent 3, 0.01 mol/L PBS containing 1% Triton X-100; Reagent 4, 0.01 mol/L PBS containing 1% ON-870), and detected by using (a) liquorice and (b) angelica sinensis samples with 0 and 100 ng/mL, respectively.

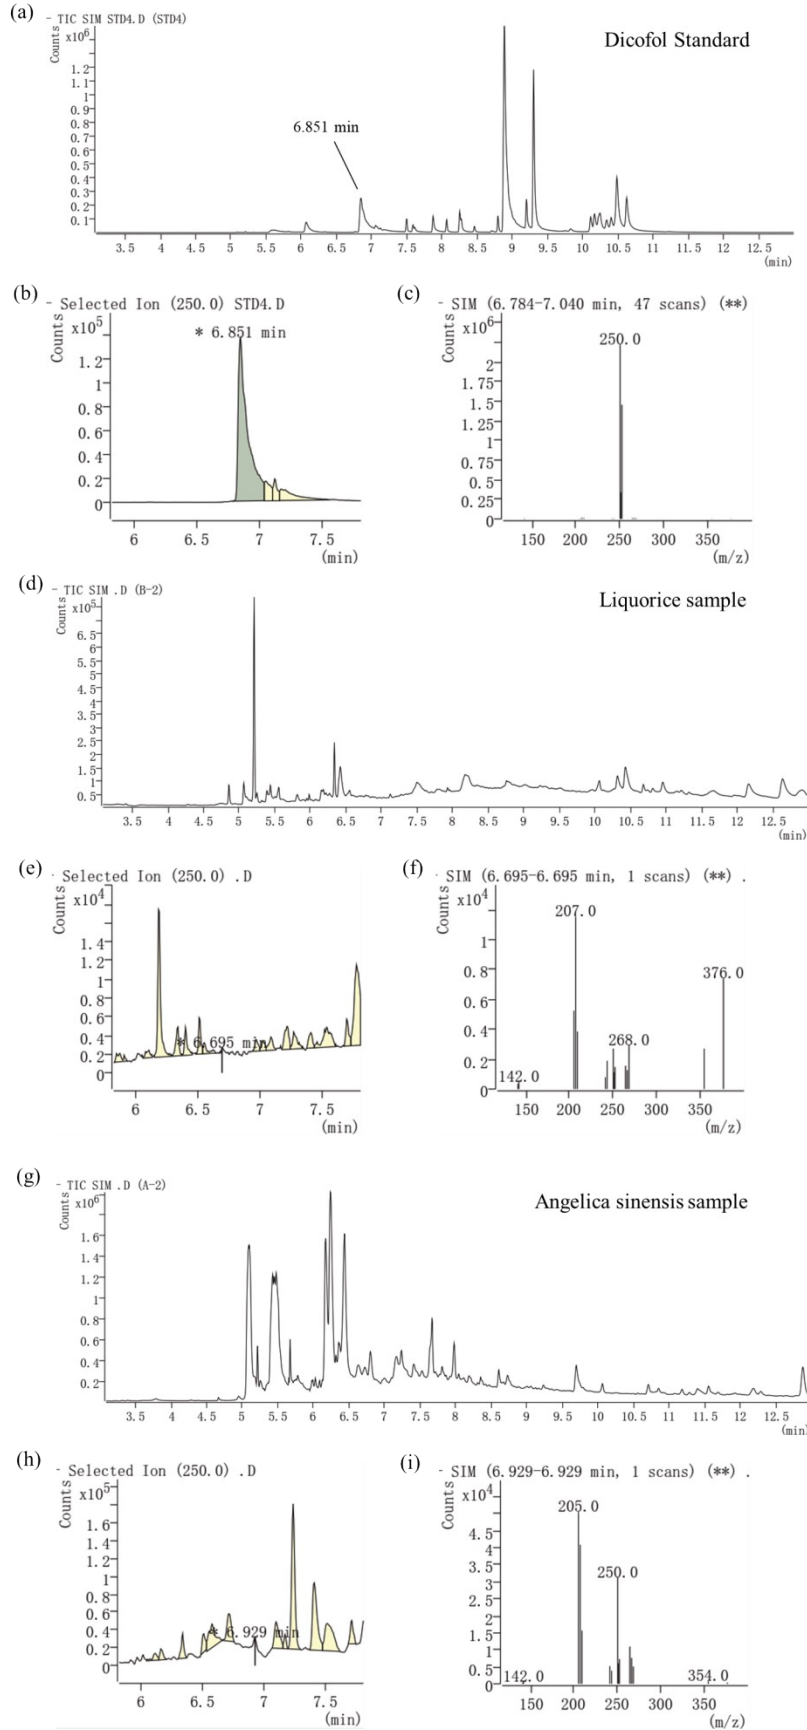

**Fig. S1** The GC-MS spectrums of dicofol negative liquorice and angelica sinensis samples.

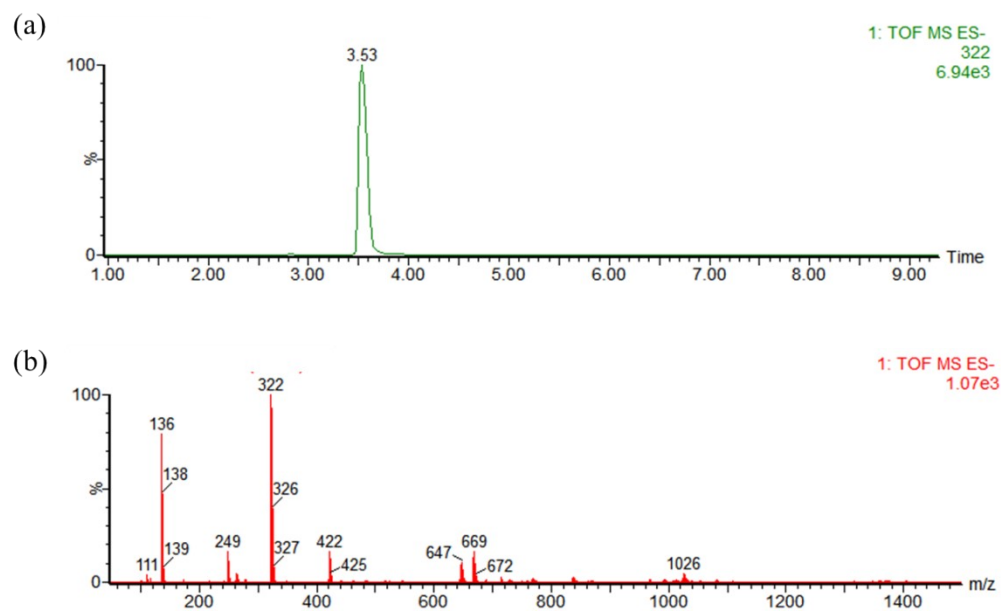

**Fig. S2** The LC-MS characterization of DICH: (a) EIC of DICH; (b) MS spectrum of DICH.

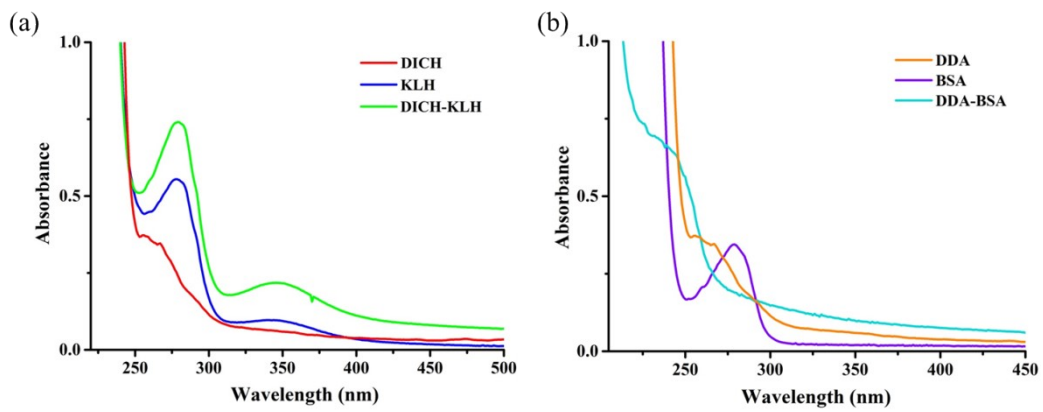

**Fig. S3** The UV absorption spectra of conjugates: (a) immunogen (DICH-KLH); (b) coating antigen (DDA-BSA).

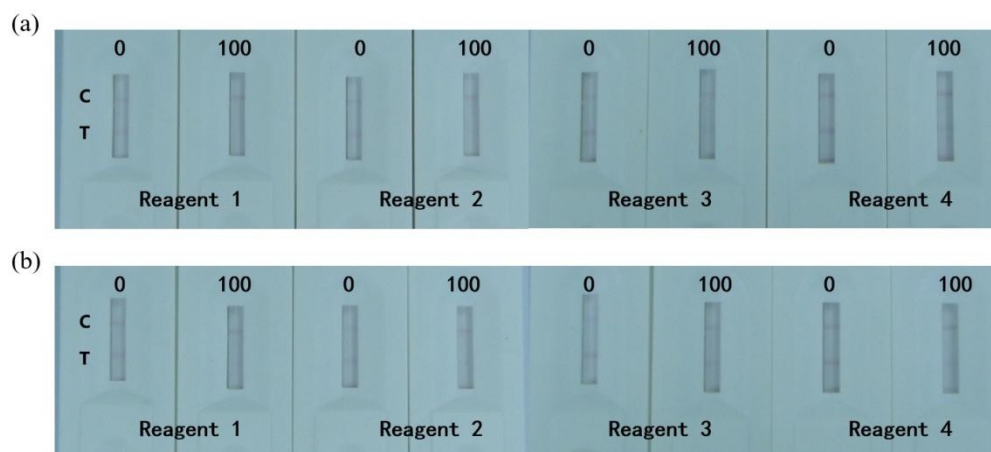

**Fig. S4** Optimization of the resuspension buffer: results from four kinds of reagents (Reagent 1, 0.01 mol/L PBS containing 1% Tween-20; Reagent 2, 0.01 mol/L PBS containing 1% PEG; Reagent 3, 0.01 mol/L PBS containing 1% Triton X-100; Reagent 4, 0.01 mol/L PBS containing 1% ON-870), and detected by using (a) liquorice and (b) angelica sinensis samples with 0 and 100 ng/mL, respectively.
